# Supplementary material for: Mapping of modifiable barriers and facilitators with interdisciplinary chronic obstructive pulmonary disease (COPD) guidelines concordance within hospitals to the Theoretical Domains Framework: a mixed methods systematic review protocol
Source: PubMed Central journal article supplement — BMJ Open. 2020 Jul 20;10(7):e036060. doi: 10.1136/bmjopen-2019-036060 (PMC7375635; doi:10.1136/bmjopen-2019-036060), 2020-07-20
Supplement: bmjopen-2019-036060supp002.pdf [file bmjopen-2019-036060supp002.pdf]

## Appendix 2. Electronic search strategy

### MEDLINE SEARCH STRATEGY

((("COPD guidelines"[All Fields] OR (Chronic[All Fields] AND obstructive[All Fields] AND ("lung diseases"[MeSH Terms] OR ("lung"[All Fields] AND "diseases"[All Fields]) OR "lung diseases"[All Fields] OR ("pulmonary"[All Fields] AND "disorder"[All Fields]) OR "pulmonary disorder"[All Fields]) AND ("guideline"[Publication Type] OR "guidelines as topic"[MeSH Terms] OR "guidelines"[All Fields]))) AND (Concordance[All Fields] OR ("patient compliance"[MeSH Terms] OR ("patient"[All Fields] AND "compliance"[All Fields]) OR "patient compliance"[All Fields] OR "compliance"[All Fields] OR "compliance"[MeSH Terms]) OR Adherence[All Fields] OR barriers[All Fields] OR enablers[All Fields]))))

| Search Actions Details | Query                                                                                                                                                                        | Results Time                 |
|------------------------|------------------------------------------------------------------------------------------------------------------------------------------------------------------------------|------------------------------|
| #5                     | Search: (((“COPD guidelines” OR “Chronic obstructive pulmonary disorder guidelines”)) AND (Concordance OR Compliance OR Adherence OR barriers OR enablers)) Filters: English | <a href="#">590</a> 09:58:35 |

### CINAHL SEARCH STRATEGY

| #  | Query                                                                                                                                               | Limiters/Expanders                                                     | Last Run Via                                                                                                       | Results |
|----|-----------------------------------------------------------------------------------------------------------------------------------------------------|------------------------------------------------------------------------|--------------------------------------------------------------------------------------------------------------------|---------|
| S1 | ( “COPD guidelines” OR “Chronic obstructive pulmonary disorder guidelines” ) AND ( Concordance OR Compliance OR Adherence OR barriers OR enablers ) | Expanders - Apply equivalent subjects<br>Search modes - Boolean/Phrase | Interface - EBSCOhost<br>Research Databases<br>Search Screen - Advanced Search<br>Database - CINAHL with Full Text | 14      |
