# Supplementary material for: Mapping of modifiable barriers and facilitators with interdisciplinary chronic obstructive pulmonary disease (COPD) guidelines concordance within hospitals to the Theoretical Domains Framework: a mixed methods systematic review protocol
Source: PubMed Central journal article supplement — BMJ Open. 2020 Jul 20;10(7):e036060. doi: 10.1136/bmjopen-2019-036060 (PMC7375635; doi:10.1136/bmjopen-2019-036060), 2020-07-20
Supplement: bmjopen-2019-036060supp003.pdf [file bmjopen-2019-036060supp003.pdf]

### Appendix 3. PRISMA FLOW DIAGRAM

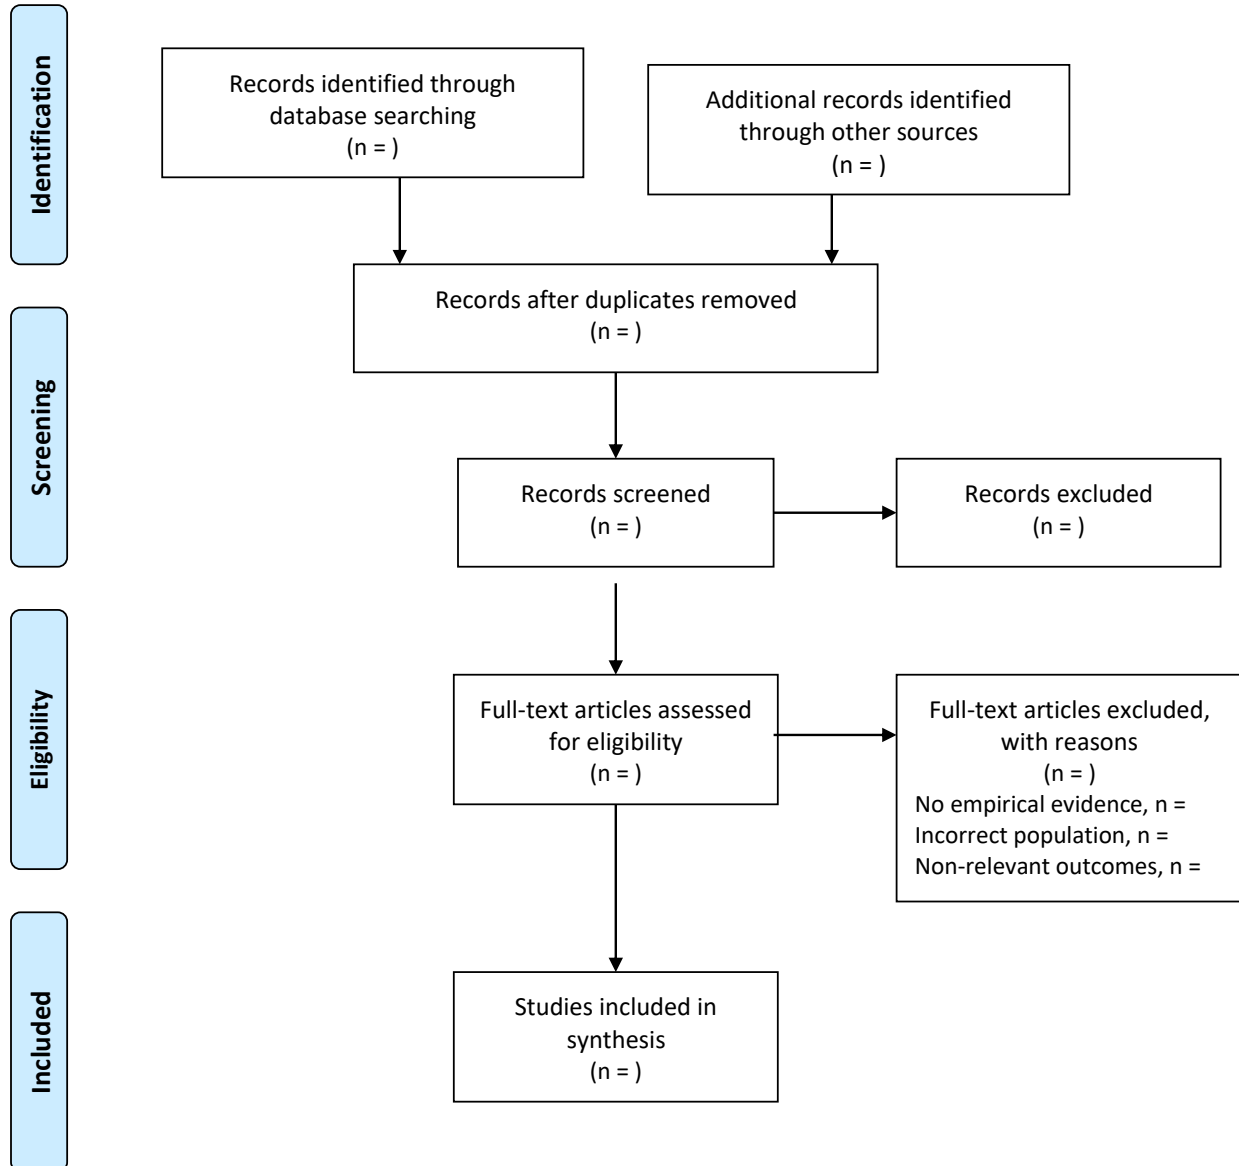

#### PRISMA Schematic tabular of review of search

Flow diagram illustrates the phases of article selection, Title and abstracts screening for initial eligibility, Eligible Full text articles in consonance to inclusion criteria, Studies included in data extraction and synthesis (Adapted from Moher et al. 2009) (34)
